# Supplementary material for: Longitudinal Associations Between Ambient Air Pollution With Insulin Sensitivity, β-Cell Function, and Adiposity in Los Angeles Latino Children
Source: Oxford University Press journal article supplement (doi:10.2337/db16-1416), 2017-01-30
Supplement: db161416supplementarydata.pdf [file db161416supplementarydata.pdf]

## SUPPLEMENTARY DATA

### Supplementary Materials

#### Statistical Analysis

AAP exposures including NO<sub>2</sub> and PM<sub>2.5</sub> were modeled as long-term exposure using cumulative 12-month averaged exposure during the follow-up ( $\bar{E}_t$ ). Linear mixed effects regression models were used to analyze relationships between adiposity and metabolic outcomes in relation to AAP exposure over time. Our multi-level model is shown below:

$$\text{Level 1: } Y_{ij} = a_i + b_i(\text{Age}_{ij}) + \gamma_1 E_{Dij} + \gamma_2 Z_{ij} + f(Yr_{ij}) + \varepsilon_{ij} \quad (1)$$

$$\text{Level 2a (level): } a_i = \alpha_0 + \alpha_1 \bar{E}_t + \alpha_2 W_i + e_i \quad (2)$$

$$\text{Level 2b (linear growth): } b_i = \beta_0 + \beta_1 \bar{E}_t + \beta_2 W_i + f_i \quad (3)$$

In this modeling framework,  $Y_{ij}$  denotes a longitudinal adiposity and metabolic outcomes for participant  $i$  at observation  $j$ . Age was centered on 18 ( $\text{Age}_{ij}$ ) and for BMI growth trajectory was modeled using a linear spline with four additional basis functions for the nonlinear features.  $Z_{ij}$  are time-dependent covariates such as Tanner stage, percent fat mass (where appropriate), the year to year fluctuation of the prior year AAP exposure (deviated from the average exposure across follow-up ( $E_{Dij} = E_{ij} - \bar{E}_t$ ), and seasonality (warm/cold).  $f(Yr_i)$  is a spline function of the study entry year to adjust for temporal variations across participants by recruitment year. Participant-specific intercepts (from Level 2a) are a function of annual averaged AAP exposure ( $\bar{E}_t$ ), participant-level characteristics ( $W_i$ : including sex, social position category, and study wave) and a participant-level random intercept ( $e_i$ ). Linear growth rates (from Level 2b) were allowed to vary by annual averaged AAP exposure (through the  $\beta_1 \bar{E}_t$  term) and additionally by sex for BMI which was found to be non-significant. A unified linear mixed effects model via standard software SAS proc MIXED procedure was used.

We examined the associations of the longitudinal measurements of adiposity and metabolic outcomes with the averaged AAP exposure across follow-up on rate of change of the outcome ( $\beta_1$ ) and the averaged AAP exposure across follow-up on the outcome at age 18 ( $\alpha_1$ ). Estimated effect estimates for each AAP were reported for a 5-ppb difference in NO<sub>2</sub> and a 4- $\mu\text{g}/\text{m}^3$  difference in PM<sub>2.5</sub>. Natural log transformations were performed on fasting glucose, fasting insulin, SI, AIR<sub>g</sub>, DI and SAAT and reported as percent change. Results were considered significant at a two-sided  $p < 0.05$ . All analyses were performed in SAS, version 9.4 (SAS, Institute, Cary, NC).

# SUPPLEMENTARY DATA

**Supplementary Table 1. Baseline Social Position Information in Exposure in Latino Children Enrolled in the Longitudinal Study**

| <b>Social Position</b>                                | <b>n=278</b> |
|-------------------------------------------------------|--------------|
| Modified Four Factor Index Score                      | 17.7 ± 9.9   |
| <b>Marital Status</b>                                 |              |
| Single                                                | 44, 16%      |
| Married / Civil Union                                 | 180, 65%     |
| Living Together                                       | 11, 4%       |
| Divorced / Separated                                  | 41, 15%      |
| Widow                                                 | 3, 0.01%     |
| <b>Mom Education<sup>a</sup></b>                      |              |
| <7 <sup>th</sup> Grade                                | 85, 31%      |
| 7-9 <sup>th</sup> Grade                               | 54, 20%      |
| Some High School                                      | 37, 13%      |
| GED                                                   | 58, 21%      |
| Some University                                       | 34, 12%      |
| Bachelor's Degree                                     | 5, 2%        |
| Graduate School                                       | 4, 1%        |
| <b>Dad Education<sup>b</sup></b>                      |              |
| <7 <sup>th</sup> Grade                                | 69, 36%      |
| 7-9 <sup>th</sup> Grade                               | 38, 20%      |
| Some High School                                      | 28, 15%      |
| GED                                                   | 34, 18%      |
| Some University                                       | 17, 9%       |
| Bachelor's Degree                                     | 5, 3%        |
| Graduate School                                       | 1, 0.5%      |
| <b>Mom Occupation<sup>a</sup></b>                     |              |
| Does Not Work Outside the Home                        | 164, 59%     |
| Farm Laborers / Menial Service Workers                | 18, 7%       |
| Unskilled Workers                                     | 31, 11%      |
| Machine Operators and Semiskilled Workers             | 25, 9%       |
| Skilled Manual Workers, Craftsman                     | 17, 6%       |
| Clerical and Sales Workers, Small Business Owners     | 8, 3%        |
| Technicians, Semiprofessionals, Small Business Owners | 8, 3%        |
| Smaller Business Owners, Minor Professionals          | 4, 1%        |
| Administrators, Lesser Professionals                  | 2, 0.7%      |
| Higher Executives, Major Professionals                | 0, 0%        |
| <b>Dad Occupation<sup>b</sup></b>                     |              |
| Does Not Work Outside the Home                        | 16, 8%       |
| Farm Laborers / Menial Service Workers                | 7, 4%        |
| Unskilled Workers                                     | 48, 25%      |

SUPPLEMENTARY DATA

|                                                       |         |
|-------------------------------------------------------|---------|
| Machine Operators and Semiskilled Workers             | 59, 31% |
| Skilled Manual Workers, Craftsman                     | 50, 26% |
| Clerical and Sales Workers, Small Business Owners     | 6, 3%   |
| Technicians, Semiprofessionals, Small Business Owners | 5, 3%   |
| Smaller Business Owners, Minor Professionals          | 0, 0%   |
| Administrators, Lesser Professionals                  | 0, 0%   |
| Higher Executives, Major Professionals                | 1, 0.5% |

Baseline social position characteristics in Latino youth. Data are reported as mean with standard deviation (SD) or with sample number and percent. Sample size is indicated as <sup>a</sup>277 and <sup>b</sup>192. Education and occupations are shown in order of ascending scores from 1-7 and 1-9, respectively.
